# Supplementary material for: Early transmission of sensitive strain slows down emergence of drug resistance in Plasmodium vivax
Source: PubMed Central journal article supplement (PMC7363008; doi:10.1371/journal.pcbi.1007945), 2020-06-17

# Supporting material: R-code figures

Mario J.C. Ayala and Daniel A.M. Villela

## Fig 3. Drug coverage varying the basic reproduction numbers

The figure illustrates R0 lines for *P. falciparum* (figures a) and *P. vivax* (figures b) models dividing by sensitive and resistant strains. 1(a and 1(b display R0 lines of sensitive and resistant strains with different resistance cost; 2(a and 2(b display R0 lines using or non-using primaquine; 3(a and 3(b display R0 lines at two infectious periods after treatment in days; 4(a and 4(b display R0 lines at two infectious periods before treatment in days.

```
#####  
#                               Functions                               #  
#                               #  
#####  
##### Paramaters  
# (1) Nm, (2) Nh, (3) a, (4) b, (5) mm, (6) alpha, (7) cs, (8) ca, (9) sigma  
# (10)psi, (11) mvl, (12)phit, (13)phiu, (14)varphi, (15)epsilon, (16)nu  
# (17)n, (18)gamma, (19)r  
#####  
##### RO function  
R0<-function(par){  
  n<- seq(0,1,0.01)  
  ROs<- sqrt((par[1]/par[2]*par[3]^2*par[4]*(par[10]+par[11])*(par[7]*par[9]+par[8]*  
                                                    (1-par[9])+n*par[9]*par[18]*par[7]*par  
                                                    (par[5]*(((1-n*par[9])*par[19]+n*par[9]*par[18])*(par[10]+par[11])-  
                                                    par[10]*((1-par[14])*n*par[9]*par[18]*par[12]+(1-n*par[9])*par[13]*par[19]))))  
  R0r<- (1-par[6])*sqrt((par[1]/par[2]*par[3]^2*par[4]*(par[10]+par[11])*(par[7]*  
                                                    par[9]+par[8]*(1-par[9])+n*  
                                                    (par[5]*(((1-n*par[9])*par[19]+n*par[9]*par[18]/(par[17]+1))*(par[10]+par[11]  
                                                    par[10]*((1-par[14])*n*par[9]*par[18]*par[12]/(par[17]+1)+(1-n*par  
                                                    par[19]))))  
  RF<-data.frame(n,ROs,R0r)  
}  
##### Plot RO function  
plotR0<-function(especie, # i=1 (P. falciparum), i=2 (P. vivax)  
                 parameter, # parameter j={1,...,19}  
                 value1, # first value of parameter  
                 value2, # Sencond value of parameter  
                 fixed_parameters){  
  i<-especie  
  j<-parameter  
  k<-value1  
  l<-value2  
  par0<-fixed_parameters  
  var<-c(expression(paste("Sensitive (",N[m],"=" ,      ) ")),  
          expression(paste("Sensitive (",N[h],"=" ,      ) ")),  
          expression(paste("Sensitive (",a,"=" ,      ) ")),  
          expression(paste("Sensitive (",b,"=" ,      ) ")),  
          expression(paste("Sensitive (",mu[m],"=" ,      ) ")),  
          expression(paste("Sensitive (",alpha,"=" ,      ) ")),  
          expression(paste("Sensitive (",c[s],"=" ,      ) ")),
```

```

expression(paste("Sensitive (" ,c[a],"=      )")),
expression(paste("Sensitive (" ,sigma,"=      ) ")),
expression(paste("Sensitive (" ,psi,"=      ) ")),
expression(paste("Sensitive (" ,mu[v1],"=      )")),
expression(paste("Sensitive (" ,phi[t],"=      ) ")),
expression(paste("Sensitive (" ,phi[u],"=      ) ")),
expression(paste("Sensitive (" ,varphi,"= ) ")),
expression(paste("Sensitive (" ,epsilon,"=      ) ")),
expression(paste("Sensitive (" ,nu,"=      ) ")),
expression(paste("Sensitive (" ,n,"=      )")),
expression(paste("Sensitive (" ,gamma," =      ) ")),
expression(paste("Sensitive (" ,r,"=      ) ")))
varr<-c(expression(paste("Resistant (" ,N[m],"=      ) ")),
expression(paste("Resistant (" ,N[h],"=      ) ")),
expression(paste("Resistant (" ,a,"=      ) ")),
expression(paste("Resistant (" ,b,"=      ) ")),
expression(paste("Resistant (" ,mu[m],"=      )")),
expression(paste("Resistant (" ,alpha,"=      ) ")),
expression(paste("Resistant (" ,c[s],"=      ) ")),
expression(paste("Resistant (" ,c[a],"=      )")),
expression(paste("Resistant (" ,sigma,"=      ) ")),
expression(paste("Resistant (" ,psi,"=      ) ")),
expression(paste("Resistant (" ,mu[v1],"=      )")),
expression(paste("Resistant (" ,phi[t],"=      ) ")),
expression(paste("Resistant (" ,phi[u],"=      ) ")),
expression(paste("Resistant (" ,varphi,"= ) ")),
expression(paste("Resistant (" ,epsilon,"=      ) ")),
expression(paste("Resistant (" ,nu,"=      ) ")),
expression(paste("Resistant (" ,n,"=      )")),
expression(paste("Resistant (" ,gamma," =      ) ")),
expression(paste("Resistant (" ,r,"=      ) ")))
par<-replace(par0,j,k)
S1<-R0(par)
plot(S1$n,S1$R0s,type="l",ylim=c(0,17),col="aquamarine4",lwd=2,xlab="Drug coverage",
ylab=expression(paste(R[0])),
cex.lab=1.1,cex.axis=1.1)
lines(S1$n,S1$R0r,type="l",col="red1",lwd=2)
par<-replace(par0,j,l)
S2<-R0(par)
lines(S2$n,S2$R0s,type="l",ylim=c(0,max(S2$R0s,S2$R0r)),lty=2,col="aquamarine4",lwd=2,
xlab="Drug coverage",ylab=expression(paste(R[0])))
lines(S2$n,S2$R0r,type="l",col="red2",lwd=2,lty=2)
lines(seq(0,1,0.01),seq(0,1,0.01)*0+1,type="l",lty=2,lwd=1,col="black")
legend("topright", c(var[j],varr[j],var[j],varr[j],
expression(paste(R[0],"=1"))),
col=c("aquamarine4","red","aquamarine4","red","black"), cex = 0.65 ,
lty=c(1,1,2,2,2),pt.cex = 2)
text(0.913, 16.65,k,cex = 0.65)
text(0.913, 15.45,k,cex = 0.65)
text(0.913, 14.35,l,cex = 0.65)
text(0.913, 13.15,l,cex = 0.65)
}
#####

```

```

# #
# Figures #
# #
#####
par(mfrow=c(2,4))
##### Fixed parameters
parf<-c(2435,624,0.21,0.5,0.033,0.28,0.4,0.12,0.9,0,1,0,0,0.5,11,1/10^12,1,1/2,1/287)
# parameter values from 10 to 13 transform R0v in R0f, do not change it.
parv<-c(2435,624,0.21,0.5,0.033,0.28,0.4,0.12,0.33,1/60,1/425,0.29,0.9,0.5,2.1,1/10^12,
1,1/9,1/60)
#### Figure 1a)
f1a<-R0(parf)
plot(f1a$n,f1a$R0s,type="l",ylim=c(0,17),col="aquamarine4",lwd=2,xlab="Drug coverage",
ylab=expression(paste(R[0])))
# cex.lab=1.1,cex.axis=1.1)
title("1a)",lwd=10.58)#,cex.main=1.7)
color<-c("#FF0000FF", "#FF4000FF", "#FF8000FF", "#FFBF00FF", "#FFFF00FF", "#FFFF80FF")
for (i in 1:6){
e=i/10
parc<-replace(parf,6,e)
R0r<- R0(parc)
lines(R0r$n,R0r$R0r,type="l",col=color[i],lwd=2)}
lines(R0r$n,R0r$R0s,type="l",col="aquamarine4",lwd=3)
lines(seq(0,1,0.04),seq(0,1,0.04)*0+1,type="l",lty=2,lwd=1,col="black")
legend("topright", c("Sensitive","Cost=0.1", "Cost=0.2"
,"Cost=0.3","Cost=0.4",
"Cost=0.5","Cost=0.6",
expression(paste(R[0], "=1"))),
col=c("aquamarine4", "#FF0000FF", "#FF4000FF", "#FF8000FF", "#FFBF00FF", "#FFFF00FF"
, "#FFFF80FF"
,"black"),lty=c(1,1,1,1,1,1,2), cex = 0.65 ,pt.cex = 2)
#### Figure 2a
# primaquine, parameter varphi (14)
plotR0(1,14,0,1,parf) # sepecie:falciparum, parameter:varphi, first value:0,
#second value:1, fixed parameters: parf(falciparum)
title("2a)",lwd=10.58)
### Figure 3a
# gamma, parameter (18)
plotR0(1,18,1/2,1/10,parf)
title("3a)",lwd=10.58)
### Figure 4a
# epsilon, parameter (15)
plotR0(1,15,2,10,parf)
title("4a)",lwd=10.58)
#### Figure 1b)
f2b<-R0(parv)
plot(f2b$n,f2b$R0s,type="l",ylim=c(0,17),col="aquamarine4",lwd=2,xlab="Drug coverage",
ylab=expression(paste(R[0])),
cex.lab=1.1,cex.axis=1.1)
title("1b)",lwd=10.58)
color<-c("#FF0000FF", "#FF4000FF", "#FF8000FF", "#FFBF00FF", "#FFFF00FF", "#FFFF80FF")
for (i in 1:6){
e=i/10

```

```

parc<-replace(parv,6,e)
R0r<- R0(parc)
  lines(R0r$n,R0r$R0r,type="l",col=color[i],lwd=2)}
lines(R0r$n,R0r$R0s,type="l",col="aquamarine4",lwd=3)
lines(seq(0,1,0.04),seq(0,1,0.04)*0+1,type="l",lty=2,lwd=1,col="black")
legend("topright", c("Sensitive","Cost=0.1","Cost=0.2",
                    ,"Cost=0.3","Cost=0.4",
                    ,"Cost=0.5","Cost=0.6",
                    expression(paste(R[0], "=1"))),
      col=c("aquamarine4","#FF0000FF", "#FF4000FF", "#FF8000FF", "#FFBF00FF", "#FFFF00FF",
            "#FFFF80FF",
            "black"), cex = 0.65 ,lty=c(1,1,1,1,1,1,2),pt.cex = 2)
#### Figure 2b
# primaquine, parameter varphi (14)
plotR0(2,14,0,1,parv) # sepecie:falciparum, parameter:varphi, first value:0,
#second value:1, fixed parameters: parf(falciparum)
title("2b)",lwd=10.58)
### Figure 3b
# gamma, parameter (18)
plotR0(2,18,1/2,1/10,parv)
title("3b)",lwd=10.58)
### Figure 4b
# epsilon, parameter (15)
plotR0(2,15,2,10,parv)
title("4b)",lwd=10.58)

```

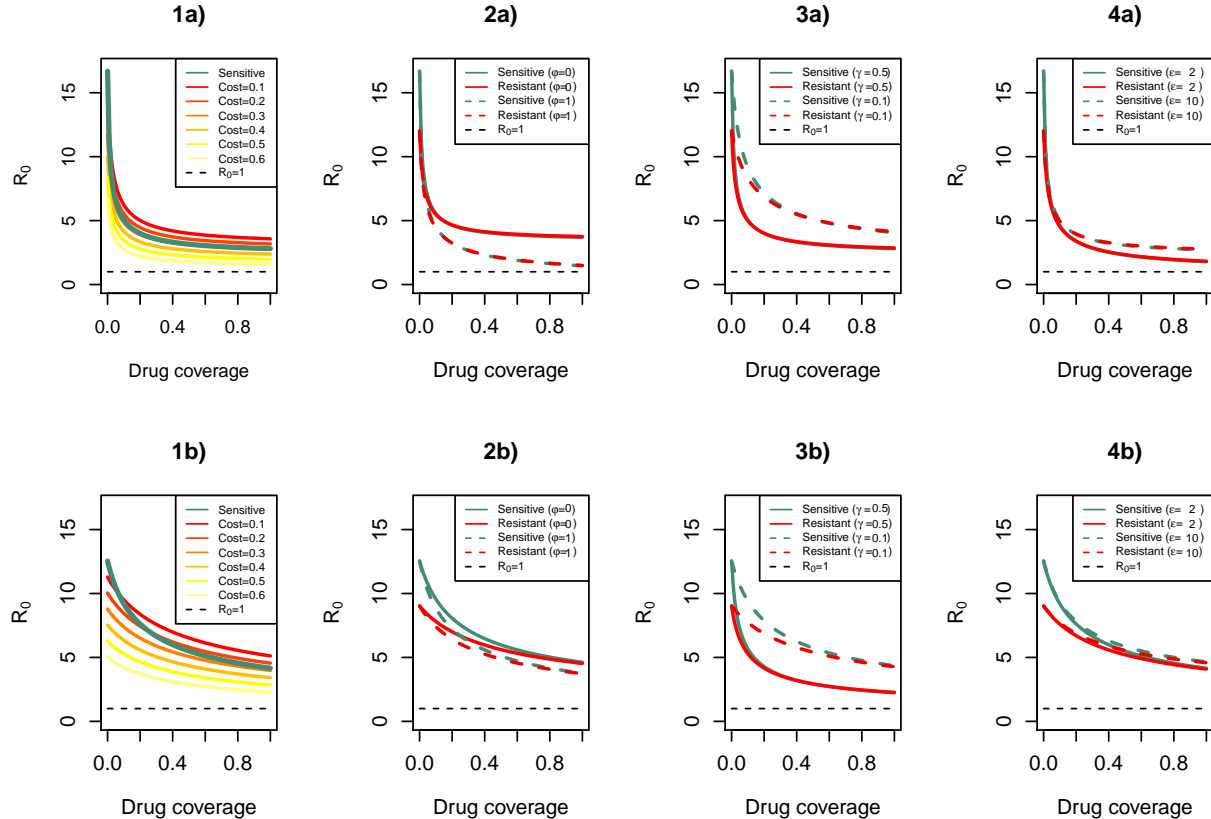

## Fig 4. Simulation of treatment regimens

This figure illustrates the implementation of four treatment-regimens: chloroquine (CQ), chloroquine plus primaquine (CQ+PQ), artemisinin combination therapy (ACT) and artemisinin combination therapy plus primaquine (ACT+PQ). First row shows the simulated regimens in *P. falciparum* model and second row shows the simulated regimens in *P. vivax* model.

```
### P. falciparum model
falciP <- function(time, y, parms) {
  with(as.list(c(y, parms)),{
    m <- Nm/Nh
    dIs <- m*a*b*Ims/Nm*Sh-(1-n*sf)*rf*Is-n*sf*gf*Is
    dP <- n*sf*gf*Is -P/k
    dIr <- (1-e)*m*a*b*Imr/Nm*Sh-(1-n*sf)*rf*Ir-n*sf*gf/(nr+1)*Ir
    dPr <- n*sf*gf/(nr+1)*Ir-Pr/(k*(nr+1))
    dSh <- -m*a*b*Ims/Nm*Sh+(1-n*sf)*rf*Is-(1-e)*m*a*b*Imr/Nm*Sh+(1-n*sf)*rf*Ir+P/k+
      Pr/(k*(nr+1))
    dIms <- a*cs*sf*Is/Nh*Sm+a*ca*(1-sf)*Is/Nh*Sm+a*cs*ep/k*(1-p)*(1-v)*P/Nh*Sm-mm*Ims
    dImr <- a*cs*sf*(1-e)*Ir/Nh*Sm+a*ca*(1-e)*(1-sf)*Ir/Nh*Sm+
      a*cs*ep/k*(1-e)*(1-p)*Pr/Nh*Sm+a*cs*ep/k*(1-p)*v*(1-e)*P/Nh*Sm-mm*Imr
    dSm <- nm*Nm-a*cs*sf*Is/Nh*Sm-a*ca*(1-sf)*Is/Nh*Sm-a*cs*ep/k*(1-p)*(1-v)*P/Nh*Sm-
      a*cs*sf*(1-e)*Ir/Nh*Sm-a*ca*(1-e)*(1-sf)*Ir/Nh*Sm-
      a*cs*ep/k*(1-e)*(1-p)*Pr/Nh*Sm-a*cs*ep/k*(1-p)*v*(1-e)*P/Nh*Sm-mm*Sm
    list(c(dIs, dP, dIr, dPr, dSh, dIms, dImr, dSm))})
}

### P. vivax model
vivax <- function(time, y, parms) {
  with(as.list(c(y, parms)),{
    m <- Nm/Nh
    dIvs <- m*a*b*Ims/Nm*Sh-((1-n*sv)*rv+n*sv*gv)*Ivs+psi*Lvs+m*a*b*psr*Ims/Nm*Lvr+m*a*b*Ims/Nm*Lvs+
    dLvs <- (1/k)*phit*(1-p)*Pv+(1-n*sv)*rv*phiu*Ivs-mvl*Lvs-psi*Lvs-m*a*b*Ims/Nm*Lvs-m*a*b*(1-e)*Imvr
    dPv <- n*sv*gv*Ivs-Pv/k
    dIvr <- m*a*b*(1-e)*Imvr/Nm*Sh-((1-n*sv)*rv+n*sv*gv/(nr+1))*Ivr+psi*Lvr+m*a*b*(1-e)*Imvr/Nm*Lvr+m*a*
    dLvr <- phiu*(1-n*sv)*rv*Ivr+phit*(1-p)*Pvr/((nr+1)*k)-psi*Lvr-mvl*Lvr-m*a*b*(1-e)*Imvr/Nm*Lvr-m*a*
    dPvr <- n*sv*gv/(nr+1)*Ivr-Pvr/(k*(nr+1))
    dSh <- -m*a*b*Ims/Nm*Sh-m*a*b*(1-e)*Imvr/Nm*Sh+mvl*(Lvs+Lvr)+(1-n*sv)*(1-phiu)*(rv*Ivs+rv*Ivr)+(1-
    dIms <- a*cs*sv*Ivs/Nh*Sm+a*ca*(1-sv)*Ivs/Nh*Sm+a*cs*ep/k*(1-v)*(1-p)*Pv/Nh*Sm-mm*Ims
    dImvr <- a*cs*sv*(1-e)*Ivr/Nh*Sm+a*ca*(1-sv)*(1-e)*Ivr/Nh*Sm+a*cs*ep/k*(1-e)*(1-p)*Pvr/Nh*Sm+a*cs*ep
    dSm <- nm*Nm-(a*cs*sv+a*ca*(1-sv))*Ivs/Nh*Sm-(a*cs*sv+a*ca*(1-sv))*(1-e)*Ivr/Nh*Sm-(a*cs*ep/k*(1-v)+
    list(c(dIvs, dLvs, dPv, dIvr, dLvr, dPvr, dSh, dIms, dImvr, dSm))})
}

#### Regimen-simulation function for P. falciparum
regimen_fal <- function(kappa, #Protective period in days
  epsilon, #Infectious period after treatment in days
  varphi, # With primaquine = 1, without primaquine = 0
  therapy, #Monotherapy=1, combined therapy=2 (two drugs)
  time # simulation time in years
){
  nu=c(1/10e12,1/10e24)
  time=seq(0,365*time)
  parf <- c(Nm=2435,Nh=624, a=0.21, b=0.5, sf=0.9, n=1, rf=1/287, nr=1, gf=1/2,cs=0.4,
    ca=0.12, mm=0.033,nm=0.033,p=0.95*varphi,k=kappa,ep=epsilon,e=0.1,
    v=nu[therapy])
  y=c(Is=1, P=0, Ir=0,Pr=0,Sh=623,Ims=0,Imr=0,Sm=2435) # initial condition
}
```

```

OP <- ode(y,time,falciP,parf)
years=OP[,1]/365
plot(years,OP[,6]/parf[2],xlim=c(min(years),max(years)),ylim=c(0,1),type="l",col="black",
      ,lwd=2,xlab="year",ylab="")
lines(years,OP[,2]/parf[2],type="l",col="aquamarine4",lwd=2)#Is
lines(years,OP[,3]/parf[2],type="l",col="aquamarine4", lty=4,lwd=2)#P
lines(years,OP[,4]/parf[2],type="l",col="red",lwd=2)#Ir
lines(years,OP[,5]/parf[2],type="l",col="red",lty=4,lwd=2)#Pr
}
#### Regimen-simulation function for P. vivax
regimen_viv <- function(kappa, #Protective period in days
                        epsilon, #Infectious period after treatment in days
                        varphi, # With primaquine = 1, without primaquine = 0
                        therapy, #Monotherapy=1, combined therapy=2 (two drugs)
                        time # simulation time in years
){
  nu=c(1/10e12,1/10e24)
  time=seq(0,365*time)
  parv <- c(Nm=2435,Nh=624,a=0.21,b=0.5,sv=0.33,n=1,rv=1/60,gv=1/9,cs=0.4,ca=0.12,
            mm=0.033,nm=0.033,p=0.95*varphi,v=nu[therapy],k=kappa,ep=epsilon,e=0.1,psi=1/60,
            psr=0.5,prs=0.5,phit=0.29,phiu=0.9,mvl=1/425,nr=1)
  y=c(Ivs=1, Lvs=0, Pvs=0, Ivvr=0, Lvvr=0, Sh=622, Imvs=0, Imvr=0, Sm=2435)
  OP <- ode(y,time,vivax,parv,method = "ode2")
  years=OP[,1]/365
  plot(years,OP[,8]/parv[2],xlim=c(min(years),max(years)),ylim=c(0,1),type="l",col="black",lwd=2,
        xlab="year",ylab="")
  lines(years,OP[,2]/parv[2],type="l",col="aquamarine4",lwd=2)#Ivs
  lines(years,OP[,3]/parv[2],type="l",col="aquamarine4",lwd=2,lty=2)#Lvs
  lines(years,OP[,4]/parv[2],type="l",col="aquamarine4",lwd=2,lty=4)#Pvs
  lines(years,OP[,5]/parv[2],type="l",col="red",lwd=2)#Ivvr
  lines(years,OP[,6]/parv[2],type="l",col="red",lwd=2,lty=2)#Lvvr
  lines(years,OP[,7]/parv[2],type="l",col="red",lwd=2,lty=4)#Pvvr
}
##### Regimen simulations and figures #####
par(mfrow=c(2,4))
##### CQ for P. falciparum
regimen_fal(30,11,0,1,50)
title(main="CQ",ylab="P. falciparum",lwd=10.58)
##### CQ+PQ for P. falciparum
regimen_fal(30,11,1,1,50)
title(main="CQ+PQ",lwd=10.58)
##### ACT for P. falciparum
regimen_fal(3,11,0,2,50)
title(main="ACT",lwd=10.58)
##### ACT+PQ for P. falciparum
regimen_fal(3,11,1,2,50)
title(main="ACT+PQ",lwd=10.58)
legend("topright", legend=c(TeX('$S_h$'),TeX('$I_{fs}$'),
                            TeX('$P_{fs}$'),TeX('$I_{fr}$'),TeX('$P_{fr}$')),
      col=c("black","aquamarine4","aquamarine4","red","red"), lty=c(1,1,4,1,4), cex=0.7,
      lwd=2,ncol=2)
##### CQ for P. vivax
regimen_viv(30,2.1,0,1,50)

```

```

title(ylab="P. vivax",lwd=10.58)
##### CQ+PQ for P. vivax
regimen_viv(30,2.1,1,1,50)
##### ACT for P. vivax
regimen_viv(3,1.55,0,2,50)
title(cex.lab=1.7)
##### ACT+PQ for P. vivax
#par(mar=c(5, 4, 3,3), xpd=TRUE)
re<-regimen_viv(3,1.55,1,2,50)
legend("topleft",legend=c(TeX('$S_h$'),TeX('$I_{vs}$'),TeX('$L_{vs}$'),TeX('$P_{vs}$')
,TeX('$I_{vr}$'),TeX('$L_{vr}$'),TeX('$P_{vr}$')),
col=c("black","aquamarine4","aquamarine4","aquamarine4","red","red","red"),
lty=c(1,1,2,4,1,2,4), cex=0.68,lwd=2,ncol=2,bg="transparent",inset=.01)

```

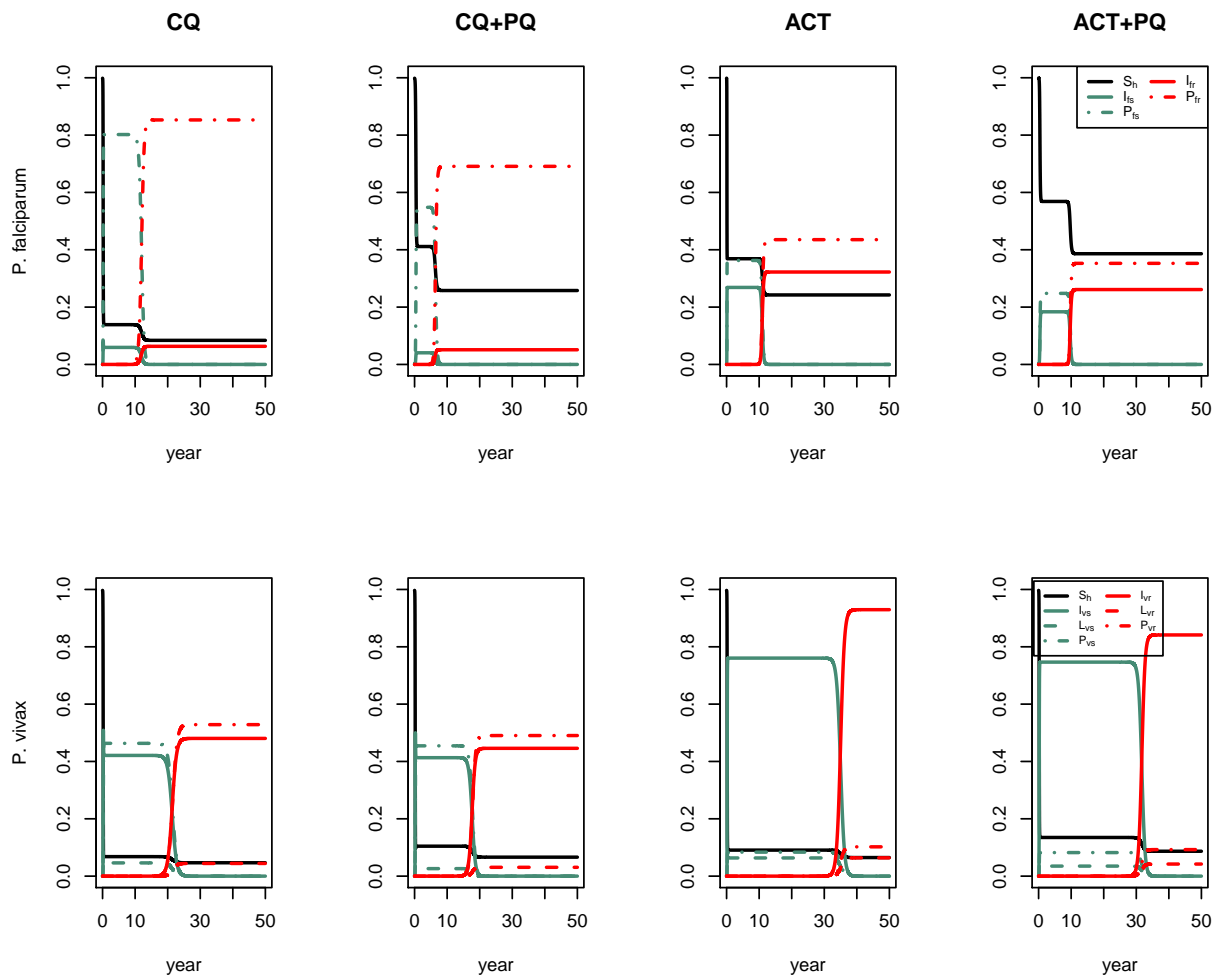

**Fig 5. Parameter sensitivity on the emergence-time of the resistant strain**

The figure illustrates parameter influence where -1 represents the maximum inverse relation (accelerate drug resistance), 1 represents the maximum proportional relation (delay drug resistance) and 0 represents no relation.

```

res_viv<-c(0.019585114,0.008129122,-0.176634662,0.063102445,-0.211633090
,-0.055122506,-0.011876919,-0.020322021,0.035809343,-0.053049253
,-0.018142337,0.035521216,0.464934960,0.077976719,0.101080519
,-0.080115639,-0.009622503,-0.024275347,-0.162420022)
res_fal<-c(-0.01139271,-0.02097551,-0.14643732,0.05480114,-0.30216895,
-0.06653930,0.06016104,0.05533678,0.06228226,-0.01864692,
0.04187478,0.03805082,0.53898674,0,0,0,0,-0.13969531)
novo_sen<-rbind(res_viv,res_fal)
para=c("Biting rate",
"Transmission probability from an infected mosquito to a susceptible human",
"Proportion of symptomatic humans",
"Recovery rate of untreated infected",
"Recurrences by drug resistance",
"Progression rate from infected to post-treatment humans",
"Transmission probability from an symptomatic to susceptible mosquito",
"Transmission probability from an asymptomatic to susceptible mosquito",
"Proportion of treated humans with primaquine",
"Probability of transmitting a resistant parasite from a post-treatment human",
"Protective period of the treatment",
"Infectious period of post-treatment humans",
"Resistance cost",
"Hypnozoite relapse rate",
"Probability of developing sensitive infection by the contact between an Imvs and a
Lvr",
"Probability of developing resistant infection by the contact between an Imvr and a
Lvs",
"Probability of post-treated human of remaining with latent parasites",
"Probability of an untreated-infected human of remaining with latent parasites",
"Treatment coverage")
data_order<-rbind(para,novo_sen)
trek<-data.frame(t(data_order))
names(trek)<-c("X1","X2","X3")
trek<-trek[order(trek$X2),]
fin<-t(rbind(trek[11:1,],trek[12:19,]))
viv1<-as.numeric(fin[2,])[1:19]
fal1<-as.numeric(fin[3,])[1:19]
varT<-rbind(viv1,fal1)
# automatic names (without math expression)
#nam<-as.character(fin[1,])[1:19]
# Fixed math expression
nam<-c(expression(paste("Resistance cost (",alpha,")")),
expression(paste("Probability of developing sensitive infection by the contact between an Imvs and a
Lvr (",alpha,")")),
expression(paste("Hypnozoite relapse rate (",psi,")")),
"Recovery rate of untreated infected (r)",
expression(paste("Proportion of treated humans with primaquine (",varphi,")")),
expression(paste("Infectious period of post-treatment humans (",epsilon,")")),
"Biting rate (a)",
"Transmission probability from an infected mosquito to a susceptible human (b)",
expression(paste("Probability of post-treated human of remaining with latent parasites (",phi[t],
"phi[t]")),
expression(paste("Transmission probability from an symptomatic to susceptible mosquito (",c[s],
"phi[t]")),
expression(paste("Protective period of treatment (",kappa,")")),
expression(paste("Transmission probability from an asymptomatic to susceptible mosquito (",c[a],
"phi[t]")),
expression(paste("Probability of an untreated-infected human of remaining with latent parasites
phi[t]"))))

```



```

expression(paste("Probability of transmitting a resistant parasite from a post-treatment human (",gamma,")")),
expression(paste("Progression rate from infected to post-treatment humans (",gamma,")")),
expression(paste("Probability of developing resistant infection by the contact between an Imvr and a Lvs (",eta,")")),
expression(paste("Treatment coverage (",eta,")")),
expression(paste("Proportion of symptomatic humans (",sigma,")")),
"Recurrences by drug resistance (n)"
)
par(xpd=NA,oma=c(0,17,0,0))
barplot(varT,
        xlab="",ylab="",xlim=c(-0.6,0.6),
        names.arg=nam[19:1],cex.axis=0.7,
        col=c("black","gray"),
        beside=TRUE,horiz = TRUE,las=2,cex.names=0.6)
abline(h=seq(0.5,60,by=3), col="gray", lty=1)
abline(v=seq(0.65,1,by=0.001), col="white", lty=1,lwd=3)
abline(h=seq(58,80,by=0.01), col="white", lty=1,lwd=3)
abline(h=seq(58,80,by=0.01), col="white", lty=1,lwd=3)
legend("topleft",legend=c("P. vivax","P. falciparum"),fill=c("black","gray"), cex=0.6)
title(xlab="Parameter influence",cex.lab=0.8)

```

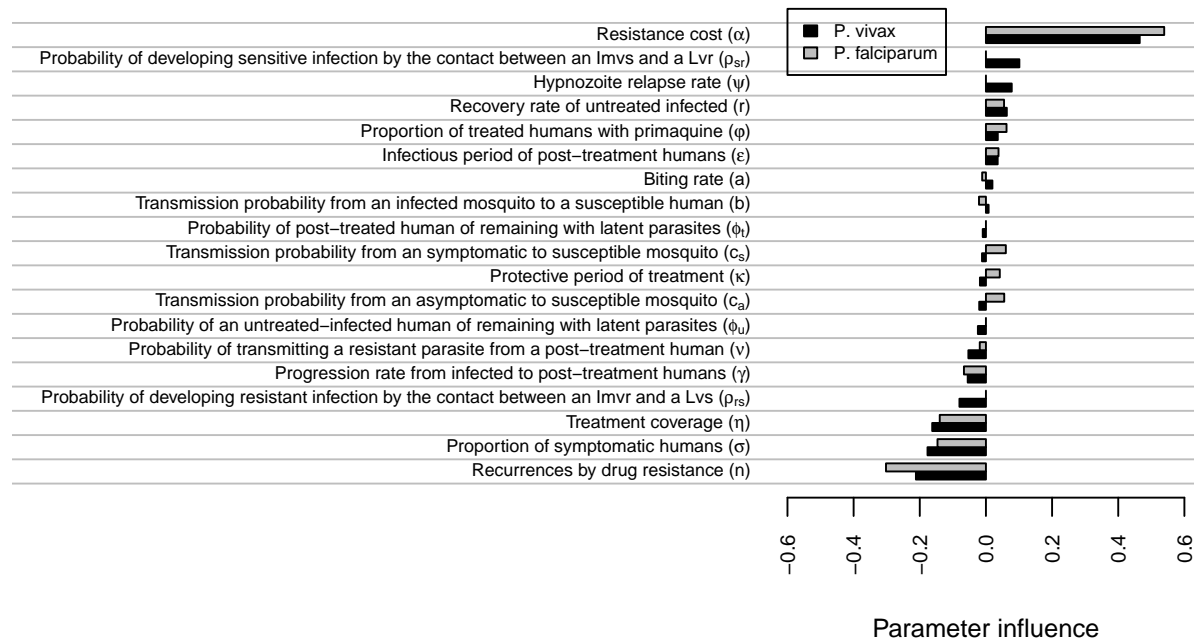

We performed the coefficients of parameter influence through next code:

P. vivax model:

Initially, we put the function of model equations:

```

Vivax <- function(t, x, params){
  Ivs <- x[1]
  Lvs <- x[2]

```

```

Pv <- x[3]
Ivr <- x[4]
Lvr <- x[5]
Pvr <- x[6]
Sh <- x[7]
Imvs <- x[8]
Imvr <- x[9]
Sm <- x[10]
Nm<-2435
Nh<-624
mm<-0.033
nm<-0.033
nh<-0
mh<-0
mvl=1/425
m <- Nm/Nh
dIvs <- m*params$a*params$b*Imvs/Nm*Sh-((1-params$n*params$sv)*params$rv+
params$n*params$sv*params$gv)*Ivs+params$psi*Lvs-mh*Ivs+
  m*params$a*params$b*params$psr*Imvs/Nm*Lvr+
  m*params$a*params$b*Imvs/Nm*Lvs+m*params$a*params$b*(1-params$prs)*Imvr/Nm*Lvs
dLvs <- (1/params$k)*params$phit*(1-params$p)*Pv+(1-params$n*params$sv)*params$rv*
  params$phiu*Ivs-
mvl*Lvs-params$psi*Lvs-mh*Lvs-m*params$a*params$b*Imvs/Nm*Lvs-
  m*params$a*params$b*(1-params$e)*Imvr/Nm*Lvs
dPv <- params$n*params$sv*params$gv*Ivs-Pv/params$k-mh*Pv
dIvr <- m*params$a*params$b*(1-params$e)*Imvr/Nm*Sh-
  ((1-params$n*params$sv)*params$rv+params$n*params$sv*params$gv/(params$nr+1))*Ivr+
params$psi*Lvr-mh*Ivr+m*params$a*params$b*(1-params$e)*Imvr/Nm*Lvr+
m*params$a*params$b*(1-params$e)*params$prs*Imvr/Nm*Lvs+
m*params$a*params$b*(1-params$psr)*Imvs/Nm*Lvr
dLvr <- params$phiu*(1-params$n*params$sv)*params$rv*Ivr+
  params$phit*(1-params$p)*Pvr/((params$nr+1)*params$k)-params$psi*Lvr-mvl*Lvr-mh* Lvr-
  m*params$a*params$b*(1-params$e)*Imvr/Nm*Lvr-m*params$a*params$b*Imvs/Nm*Lvr
dPvr <- params$n*params$sv*params$gv/(params$nr+1)*Ivr-Pvr/(params$k*(params$nr+1))-
  mh*Pv
dSh <- nh*Nh-m*params$a*params$b*Imvs/Nm*Sh-m*params$a*params$b*(1-params$e)*Imvr/Nm*Sh+
mvl*(Lvs+Lvr)+(1-params$n*params$sv)*(1-params$phiu)*(params$rv*Ivs+params$rv*Ivr)+
(1-params$phit*(1-params$p))/params$k*Pv+(1-params$phit*(1-params$p))/
  (params$k*(params$nr+1))*Pvr-mh*Sh
dImvs <- params$a*params$cs*params$sv*Ivs/Nh*Sm+params$a*params$ca*(1-params$sv)*Ivs/Nh*Sm+
  params$a*params$cs*params$ep/params$k*(1-params$v)*(1-params$p)*Pv/Nh*Sm-mm*Imvs
dImvr <- params$a*params$cs*params$sv*(1-params$e)*Ivr/Nh*Sm+
  params$a*params$ca*(1-params$sv)*(1-params$e)*Ivr/Nh*Sm+
  params$a*params$cs*params$ep/params$k*(1-params$e)*(1-params$p)*Pvr/Nh*Sm+
  params$a*params$cs*params$ep/params$k*(1-params$e)*(1-params$p)*params$v*Pv/Nh*Sm-
  mm*Imvr
dSm <- nm*Nm-
  (params$a*params$cs*params$sv+params$a*params$ca*(1-params$sv))*Ivs/Nh*Sm-
  (params$a*params$cs*params$sv+params$a*params$ca*(1-params$sv))*(1-params$e)*Ivr/Nh*Sm-
  (params$a*params$cs*params$e/params$k*(1-params$v)+params$a*params$cs*params$ep/params$k*
(1-params$e)*params$v)*(1-params$p)*Pv/Nh*Sm-
  params$a*params$cs*params$ep/params$k*(1-params$e)*(1-params$p)*Pvr/Nh*Sm-mm*Sm
list(c(dIvs, dLvs, dPv, dIvr, dLvr, dPvr, dSh, dImvs, dImvr, dSm))

```

```

}
require(deSolve)
times <- seq(0,365*50, by=1) #solve for 50 years

```

Then, we made the latin hypercube sampling of 500 point per parameter. We established a parameter range using the sources from main text (table 1, model parameters).

```

##### Latin hypercube sampling #####
require(lhs) #add the lhs library
h <- 500 #choose number of points
lhs<-maximinLHS(h,18) #simulate ### 18parameters ###
##### Parameter range #####
#a=0.21
a.min<-0.1
a.max<-1
#b=0.5
b.min<-0.45
b.max<-0.65
#sv=0.33
sv.min<-0
sv.max<-1
# rv=1/60
rv.min<-0.0014
rv.max<-0.017
#nr=1
nr.min<-0
nr.max<-2
#gf=1/2
gv.min<-1/15
gv.max<-1/6
#cs=0.4
cs.min<-0.16
cs.max<-0.4
#ca=0.12
ca.min<-0.05
ca.max<-0.17
#p=0.95*0
p.min<-0
p.max<-0.95
#v=1/10e12
v.min<-1/10e24
v.max<-1/10e12
#k=30
k.min<-3
k.max<-30
#ep=11
ep.min<-1
ep.max<-30
#e=0.1
e.min<-0.05
e.max<-1
#psi<-1/60
psi.min <- 1/365
psi.max <- 1/30

```

```

#psr=0.5
psr.min <- 0
psr.max <- 1
#prs=0.5
prs.min <- 0
prs.max <- 1
# phit <- 0.29
phit.min <- 0
phit.max <- 1
# phiu <- 0.9
phiu.min <- 0
phiu.max <- 1
##### latin hypercube sample
params.set <- cbind(
  a = lhs[,1]*(a.max-a.min)+a.min,
  b = lhs[,2]*(b.max-b.min)+b.min,
  sv= lhs[,3]*(sv.max-sv.min)+sv.min,
  rv= lhs[,4]*(rv.max-rv.min)+rv.min,
  nr= lhs[,5]*(nr.max-nr.min)+nr.min,
  gv= lhs[,6]*(gv.max-gv.min)+gv.min,
  cs= lhs[,7]*(cs.max-cs.min)+cs.min,
  ca= lhs[,8]*(ca.max-ca.min)+ca.min,
  p = lhs[,9]*(p.max-p.min)+p.min,
  v = lhs[,10]*(v.max-v.min)+v.min,
  k = lhs[,11]*(k.max-k.min)+k.min,
  ep= lhs[,12]*(ep.max-ep.min)+ep.min,
  e = lhs[,13]*(e.max-e.min)+e.min,
  psi=lhs[,14]*(psi.max-psi.min)+psi.min,
  psr=lhs[,15]*(psr.max-psr.min)+psr.min,
  prs=lhs[,16]*(prs.max-prs.min)+prs.min,
  phit=lhs[,17]*(phit.max-phit.min)+phit.min,
  phiu=lhs[,18]*(phiu.max-phiu.min)+phiu.min
)
##### treatment coverage n ####
l <- 40
##### simulating points #####
h2 <-500

```

We obtained the emergence time (when the prevalence of resistant strain overcomes the prevalence of sensitive strain) per sampling:

```

### 18 variables + n + emergence = 20 ###
j <- 1
data <- data.frame(matrix(rep(NA,l*h2*20),nrow=l*h2))
for(i in 1:h2){
  for (n in seq(0,1,length=1)){
    xstart<- c(Ivs=1,Lvs=0,Pv=0,Ivr=0,Lvr=0,Pvr=0,Sh=622,Imvs=0,Imvr=0,Sm=2435)
    params <- as.list(c(params.set[i,],n=n))
    out <- as.data.frame(lsoda(xstart, times, Vivax, params))
    emergence<-(365*50-sum(as.numeric(out$Ivr>out$Ivs)))/365
    data[j,1:19] <- params
    data[j,20] <- emergence
    j <- j+1
  }
}

```

```

}
names(data) <- c(names(params), 'Emergence')

```

Finally, we obtained the parameter influence using the emergence time from “data” matrix

```

#### Sensitivity ####
require(sensitivity)
library(latex2exp)
sad <- pcc(data[,1:19], data[,20], nboot = 100, rank=TRUE)

```

We implemented the same process with the P. falciparum model:

```

falciP <- function(t, x, params){
  Is <- x[1]
  P <- x[2]
  Ir <- x[3]
  Pr <- x[4]
  Sh <- x[5]
  Ims <- x[6]
  Imr <- x[7]
  Sm <- x[8]
  Nm<-2435
  Nh<-624
  mm<-0.033
  nm<-0.033
  nh<-0
  mh<-0
  m <- Nm/Nh
  dIs <- m*params$a*params$b*Ims/Nm*Sh-(1-params$n*params$sf)*params$rf*Is-params$n
  *params$sf*params$gf*Is-mh*Is
  dP <- params$n*params$sf*params$gf*Is -P/params$k-mh*P
  dIr <- (1-params$e)*m*params$a*params$b*Imr/Nm*Sh-(1-params$n*params$sf)*params$rf*
  Ir-params$n*params$sf*params$gf/(params$nr+1)*Ir-mh*Ir
  dPr <- params$n*params$sf*params$gf/(params$nr+1)*Ir-Pr/(params$k*(params$nr+1))-mh*Pr
  dSh <- -m*params$a*params$b*Ims/Nm*Sh+(1-params$n*params$sf)*params$rf*Is-(1-params$e)*
  m*params$a*params$b*Imr/Nm*Sh+(1-params$n*params$sf)*params$rf*Ir+P/params$k+
  Pr/(params$k*(params$nr+1))+nh*Nh-mh*Sh
  dIms <- params$a*params$cs*params$sf*Is/Nh*Sm+params$a*params$ca*(1-params$sf)*
  Is/Nh*Sm+params$a*params$cs*params$ep/params$k*(1-params$p)*(1-params$v)*P/Nh*Sm-mm*Ims
  dImr <- params$a*params$cs*params$sf*(1-params$e)*Ir/Nh*Sm+params$a*params$ca*
  (1-params$e)*(1-params$sf)*Ir/Nh*Sm+params$a*params$cs*params$ep/params$k*
  (1-params$e)*(1-params$p)*Pr/Nh*Sm+params$a*params$cs*params$ep/params$k*
  (1-params$p)*params$v*(1-params$e)*P/Nh*Sm-mm*Imr
  dSm <- nm*Nm-params$a*params$cs*params$sf*Is/Nh*Sm-params$a*params$ca*(1-params$sf)*
  Is/Nh*Sm-params$a*params$cs*params$ep/params$k*(1-params$p)*(1-params$v)*P/Nh*Sm-
  params$a*params$cs*params$sf*(1-params$e)*Ir/Nh*Sm-params$a*params$ca*(1-params$e)*
  (1-params$sf)*Ir/Nh*Sm-params$a*params$cs*params$ep/params$k*(1-params$e)*(1-params$p)*
  Pr/Nh*Sm-params$a*params$cs*params$ep/params$k*(1-params$p)*params$v*(1-params$e)*
  P/Nh*Sm-mm*Sm
  list(c(dIs, dP, dIr, dPr, dSh, dIms, dImr, dSm))
}
require(deSolve)
times <- seq(0,365*50, by=1) #solve for 50 years
##### Latin hypercube sampling #####
require(lhs) #add the lhs library

```

```

h <- 500 #choose number of points
lhs<-maximinLHS(h,13) #simulate ### 13 parameters ###
##### Parameter range #####
#a=0.21
a.min<-0.
a.max<-1
#b=0.5
b.min<-0.45
b.max<-0.65
#sf=0.9
sf.min<-0
sf.max<-1
# rf=1/287
rf.min<-0.0014
rf.max<-0.017
#nr=1
nr.min<-0
nr.max<-2
#gf=1/2
gf.min<-1/15
gf.max<-1
#cs=0.4
cs.min<-0.16
cs.max<-0.4
#ca=0.12
ca.min<-0.05
ca.max<-0.17
#p=0.95*0
p.min<-0
p.max<-0.95
#v=1/10e12
v.min<-1/10e24
v.max<-1/10e12
#k=30
k.min<-3
k.max<-30
#ep=11
ep.min<-1
ep.max<-30
#e=0.1
e.min<-0.05
e.max<-1
##### latin hypercube sample
params.set <- cbind(
a = lhs[,1]*(a.max-a.min)+a.min,
b = lhs[,2]*(b.max-b.min)+b.min,
sf= lhs[,3]*(sf.max-sf.min)+sf.min,
rf= lhs[,4]*(rf.max-rf.min)+rf.min,
nr= lhs[,5]*(nr.max-nr.min)+nr.min,
gf= lhs[,6]*(gf.max-gf.min)+gf.min,
cs= lhs[,7]*(cs.max-cs.min)+cs.min,
ca= lhs[,8]*(ca.max-ca.min)+ca.min,
p = lhs[,9]*(p.max-p.min)+p.min,

```

```

v = lhs[,10]*(v.max-v.min)+v.min,
k = lhs[,11]*(k.max-k.min)+k.min,
ep= lhs[,12]*(ep.max-ep.min)+ep.min,
e = lhs[,13]*(e.max-e.min)+e.min
)
##### treatment coverage n #####
l <- 40
##### simulating points #####
h2 <-500
### 13 variables + n + emergence = 15 ###
j <- 1
data <- data.frame(matrix(rep(NA,l*h2*15),nrow=l*h2))
for(i in 1:h2){
for (n in seq(0,1,length=1)){
xstart <- c(Is=1,P=0,Ir=0,Pr=0,Sh=623,Ims=0,Imr=0,Sm=2435)
params <- as.list(c(params.set[i,],n=n))
out <- as.data.frame(lsoda(xstart, times, falciP, params))
emergence<-((365*50-sum(as.numeric(out$Ir>out$Is)))/365
data[j,1:14] <- params
data[j,15] <- emergence
j <- j+1
}
}
names(data) <- c(names(params),'Emergence')
#### Sensitivity ####
require(sensitivity)
sad <- pcc(data[,1:14], data[,15], nboot = 100, rank=TRUE)

```

## Figure A. Simulation of no-regimens

This figure illustrates the situation with no-regimen.

```

library(deSolve)
library(latex2exp)
time=seq(0,365*50)
parf <- c(Nm=2435,Nh=624, a=0.21, b=0.5, sf=0.9, n=0, rf=1/287, nr=1, gf=1/2,cs=0.4,
ca=0.12, mm=0.033,nm=0.033,p=0.95*0,k=30,ep=3,e=0.1,
v=1/10e12)
y=c(Is=1, P=0, Ir=0,Pr=0,Sh=623,Ims=0,Imr=0,Sm=2435) # initial condition
OP <- ode(y,time,falciP,parf)
years=OP[,1]/365
par(mfrow=c(1,2))
plot(years,OP[,6]/parf[2],xlim=c(min(years),max(years)),ylim=c(0,1),type="l",col="black",
, lwd=2,xlab="year",ylab="")
lines(years,OP[,2]/parf[2],type="l",col="aquamarine4",lwd=2)#Is
lines(years,OP[,3]/parf[2],type="l",col="aquamarine4", lty=4,lwd=2)#P
lines(years,OP[,4]/parf[2],type="l",col="red",lwd=2)#Ir
lines(years,OP[,5]/parf[2],type="l",col="red",lty=4,lwd=2)#Pr
title("P. falciparum")
legend("topright", legend=c(TeX('$S_h$'),TeX('$I_{fs}$'),
TeX('$P_{fs}$'),TeX('$I_{fr}$'),TeX('$P_{fr}$')),
col=c("black","aquamarine4","aquamarine4","red","red"), lty=c(1,1,4,1,4), cex=1.1,
lwd=2,ncol=1)

```

```
#### No-Regimen simulation function for P. vivax
```

```

time=seq(0,365*50)
parv <- c(Nm=2435,Nh=624,a=0.21,b=0.5,sv=0.33,n=0,rv=1/60,gv=1/9,cs=0.4,ca=0.12,
         mm=0.033,nm=0.033,p=0.95*0,v=1/10e12,k=3,ep=1.55,e=0.1,psi=1/60,
         psr=0.5,prs=0.5,phit=0.29,phiu=0.9,mvl=1/425,nr=1)
y=c(Ivs=1, Lvs=0, Pv=0, Ivr=0, Lvr=0, Pvr=0, Sh=622, Imvs=0, Imvr=0, Sm=2435)
OP <- ode(y,time,vivax,parv,method = "ode2")
years=OP[,1]/365
plot(years,OP[,8]/parv[2],xlim=c(min(years),max(years)),ylim=c(0,1),type="l",col="black",
     ,lwd=2,xlab="year",ylab="")
lines(years,OP[,2]/parv[2],type="l",col="aquamarine4",lwd=2)#Ivs
lines(years,OP[,3]/parv[2],type="l",col="aquamarine4",lwd=2,lty=2)#Lvs
lines(years,OP[,4]/parv[2],type="l",col="aquamarine4",lwd=2,lty=4)#Pvs
lines(years,OP[,5]/parv[2],type="l",col="red",lwd=2)#Ivr
lines(years,OP[,6]/parv[2],type="l",col="red",lwd=2,lty=2)#Lvr
lines(years,OP[,7]/parv[2],type="l",col="red",lwd=2,lty=4)#Pvr
legend("topright", legend=c(TeX('$S_h$'),TeX('$I_{vs}$'),TeX('$L_{vs}$'),TeX('$P_{vs}$'),
                          ,TeX('$I_{vr}$'),TeX('$L_{vr}$'),TeX('$P_{vr}$')),
      col=c("black","aquamarine4","aquamarine4","aquamarine4","red","red","red"),
      lty=c(1,1,2,4,1,2,4), cex=1.1,lwd=2,ncol=1)
title("P. vivax")

```

**P. falciparum**

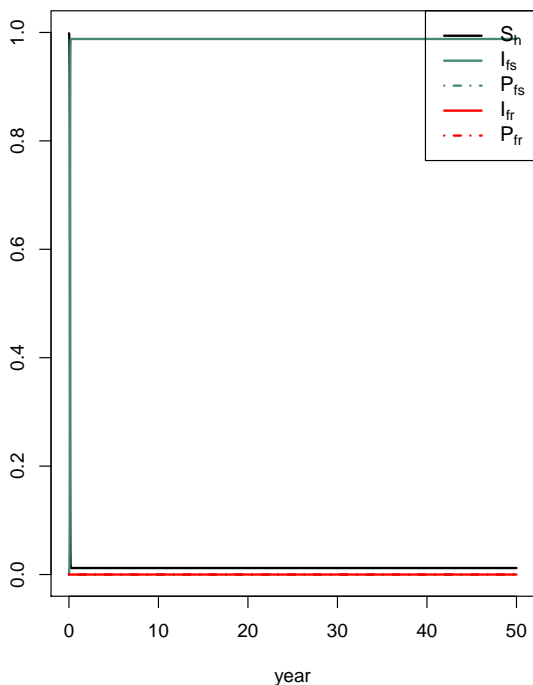

**P. vivax**

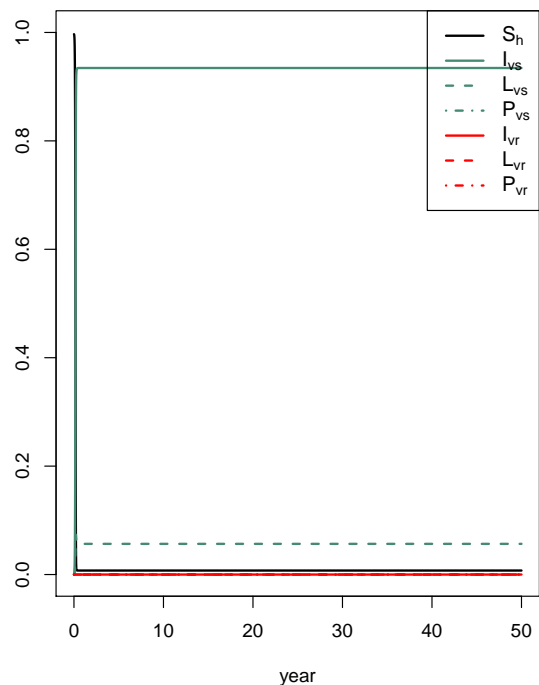

Supplement: pcbi.1007945.s002.pdf [file pcbi.1007945.s002.pdf]
